# Supplementary material for: Griffithsin carrageenan fast dissolving inserts prevent SHIV HSV-2 and HPV infections in vivo
Source: PubMed Central journal article supplement (PMC6155161; doi:10.1038/s41467-018-06349-0), 2018-09-24
Supplement: 41467_2018_6349_MOESM1_ESM.pdf [file 41467_2018_6349_MOESM1_ESM.pdf]

- 1 **Griffithsin/Carrageenan Fast Dissolving Inserts Prevent SHIV HSV-2 and HPV Infections**
- 2 *in vivo*
- 3 Derby, et al.



21 **Supplementary Figure 1. Envelope sequencing of SHIV SF162P3 stock and plasma virus**  
 22 **in infected macaques.** SHIV SF162P3 gp120 sequence was determined by isolating and  
 23 reverse transcribing viral RNA from the cell-free virus stock and from the plasma of two infected  
 24 animals as described in Supplementary Methods. cDNA was PCR amplified and cloned into *E.*  
 25 *coli* for sequencing. The sequences of SHIV SF162P3 from stock (10 clones) and macaque  
 26 plasma (5 clones from 1 GRFT/CG FDI animal and 1 clone from 1 CG FDI animal) were aligned  
 27 against the published sequence of SHIV SF162P3 envelope (Davis, D., Verschoor, E.J. &  
 28 Fagrouch, Z. Envelope evolution of SHIVsf162p3 in rhesus macaques. in *NCBI GenPept*  
 29 (2011)). One potential N-linked glycosylation site (PNG, N228) was found to be mutated in the  
 30 stock virus compared with the published sequence. Variation in the stock centered around the  
 31 GPGK motif at the tip of the V3 loop and macaque plasma virus lacked the methionine and  
 32 leucine-containing variants. No variation was detected in the stock virus in regions associated  
 33 with GRFT resistance and no GRFT-related selection was detected in the few clones obtained  
 34 from infected animals.

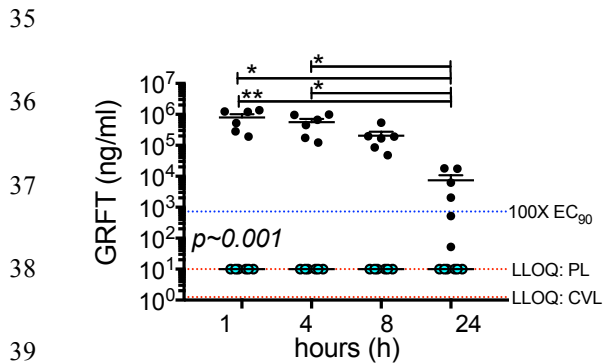

35  
 36  
 37  
 38  
 39  
 40 **Supplementary Figure 2. GRFT PK profile in macaque CVLs.** GRFT levels were measured  
 41 in non-DMPA-treated macaques 1, 4, 8, or 24 hours post-insertion of GRFT/CG FDIs (n=6  
 42 macaques per time point). GRFT concentrations are shown in CVL (black symbols) and plasma  
 43 (PL, aqua symbols). GRFT was not detected in plasma above the lower limit of quantification  
 44 (LLOQ) of the assay, which was 10 ng/ml (top red dotted line), and so the values are shown at

45 the LLOQ. The LLOQ for CVL was 1.25 ng/ml (bottom red dotted line). The 100-fold EC<sub>90</sub> level,  
 46 724.4 ng/ml, is also indicated (blue dotted line). The change in GRFT concentration present in  
 47 CVL over time was analyzed by Kruskal Wallis test with Dunns post-test for Kruskal Wallis  
 48  $p < 0.05$ . The Kruskal Wallis  $p$  value is italicized, and the Dunns comparisons are indicated by  
 49 asterisks: \*  $< 0.05$ , \*\*  $< 0.01$ . For each group, the mean  $\pm$  standard error of the mean (SEM) is  
 50 indicated by line and error bars.

51

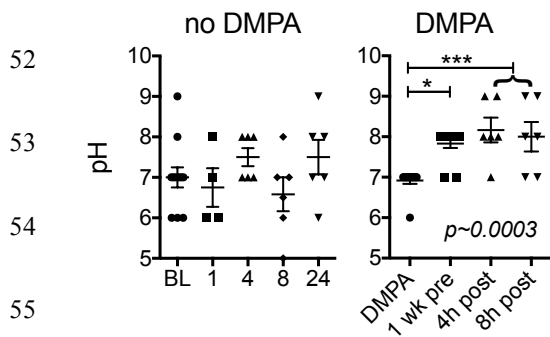

56 **Supplementary Figure 3. Vaginal pH.** For non-DMPA-treated macaques (left), the pH was  
 57 measured at baseline (BL) and at 1, 4, 8, and 24 hours post FDI-insertion (n=6 macaques per  
 58 time point). For DMPA-treated macaques (right), the pH was measured on the day of DMPA  
 59 injection (DMPA), one week before FDI insertion (1 wk pre) and then at either 4 hours or 8  
 60 hours post insertion (4h post, 8h post, respectively) (n=4-6 macaques per time point). The  
 61 Kruskal-Wallis test was used to analyze the data, and Dunns pairwise comparisons were  
 62 performed for a Kruskal-Wallis  $p < 0.05$ . Kruskal-Wallis  $p$  values are italicized and the Dunns  
 63 comparisons are indicated by asterisks: \*  $< 0.05$ , \*\*\* $< 0.001$ . 4h and 8h data were combined for  
 64 comparison of post-FDI with pre-FDI time points in DMPA-treated macaques. For each group,  
 65 the mean  $\pm$  SEM is indicated by line and error bars.

66

67 **SUPPLEMENTARY METHODS**

68 *SHIV SF162P3 Envelope Sequencing*

69 The virus envelope was sequenced by a clonal sequencing approach as follows: RNA was  
70 isolated from the virus stock using the QIAmp UltraSens Virus kit (Qiagen) as described<sup>61</sup> and  
71 reverse transcribed using the Superscript III Reverse Transcriptase with OFM19 5' primer (5'-  
72 GCA CTC AAG GCA AGC TTT ATT GAG GCT TA-3') or random oligo hexamers (Invitrogen).  
73 PCR amplification of the whole envelope gene (3.2 kb) was carried out using Pfu Taq PCR  
74 master mix (Agilent/Stratagene) and the following primers: EnvA (5'-CTT AGG CAT CTC CTA  
75 TGG CAG GAA GAA-3') and EnvN (5'-CTG CCA ATC AGG GAA GTA GCC TTG TGT-3').  
76 Nested PCR was carried out on cleaned up PCR products (QIAquick PCR purification kit,  
77 Qiagen) using Pfu Taq PCR master mix and the following primers: Env Ph (5'-AAA GAG CAG  
78 AAG ACA GTG GCA ATG AGA GTG AAG G-3') and V52 Ph (5'-ATA GTG CTT CCT GCT GCT  
79 CCC AAG AA-3') to generate 900 kb products. Amplicons were cloned into *E. coli* (Top10) using  
80 the BLUNT TOPO cloning kit (Invitrogen) according to the manufacturer's instructions. DNA was  
81 isolated from the colonies (QIAprep Spin Miniprep kit), digested with ECOR1 to check for the  
82 presence of the 900 kb insert, and insert-containing samples sequenced (Genewiz) with three  
83 primers: V31 (sense strand, 5'-TCA GCA CAG TAC AAT GTA CAC ATG GAA T-3'), AV307  
84 (anti-sense strand, 5'-TCT TCT TCT GCT AGA CTG CCA T-3'), and V32 (anti-sense strand, 5'-  
85 AGT AGA AAA ATT CCC CTC CAC AAT TAA A-3'). Sequences were analyzed using DNASTar  
86 Lasergene 8.
